# Supplementary material for: A Performance Comparison of Anaerobic and an Integrated Anaerobic-Aerobic Biological Reactor System for the Effective Treatment of Textile Wastewater
Source: Hindawi journal article supplement (doi:10.1155/2021/8894332), 2021-02-09
Supplement: f1 [file 8894332.f1.doc]

**Supplementary Files**


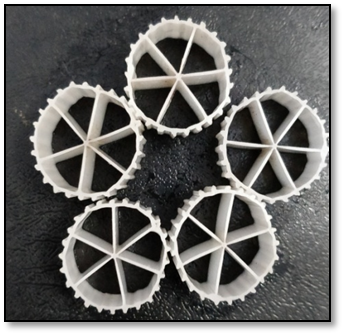

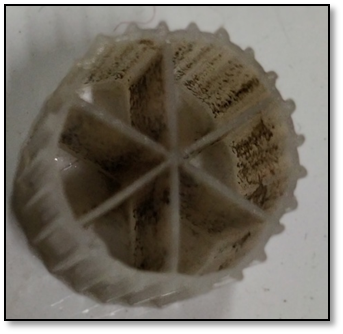


**Figure S1** K1 media (a) before and (b) after biofilm formation


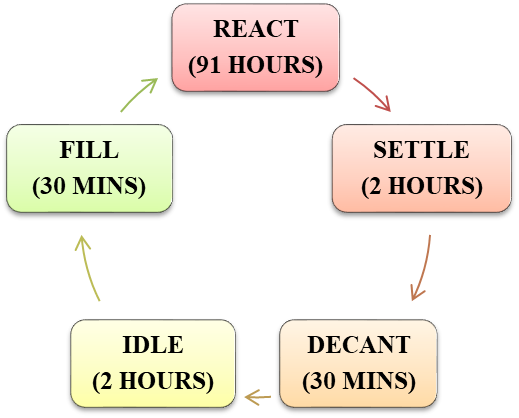


**Figure S2** Operational cycle of the An-SBR


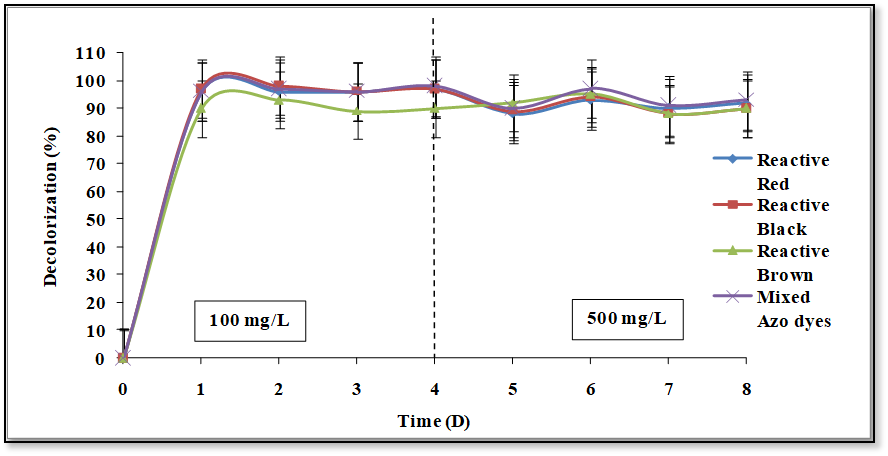


**Figure S3 (a)** Decolorization of mixed Azo dyes in the sequential anaerobic-aerobic treatment process carried out in the An-SBR and aerobic MBBR


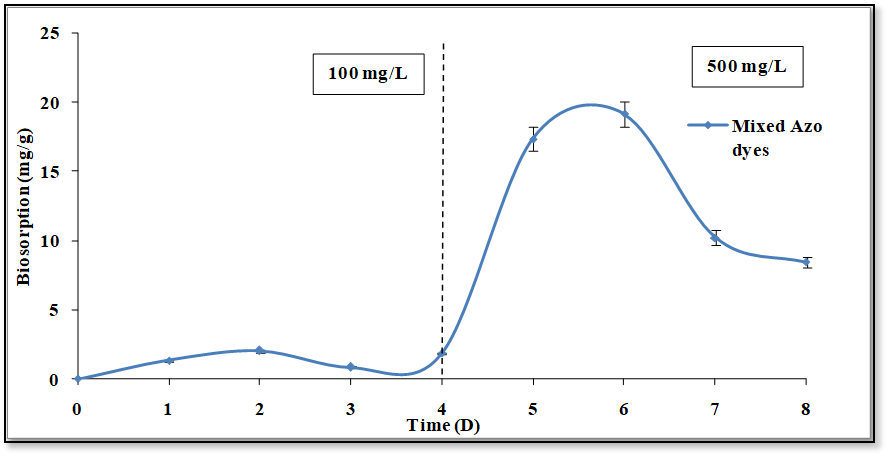


**Figure S3 (b)** Biosorption of dyes into the biomass in the sequential anaerobic-aerobic treatment processes carried out in the An-SBR and aerobic MBBR


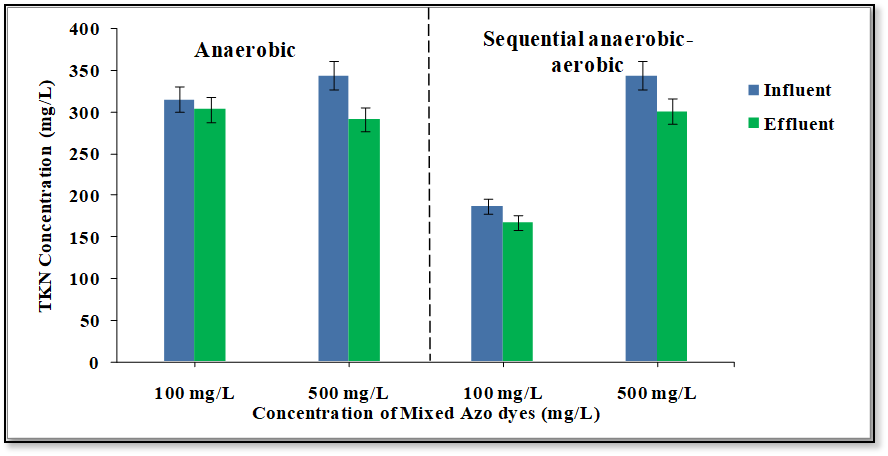


**Figure S4** Removal of TKN in the complete anaerobic and the sequential anaerobic-aerobic treatment process


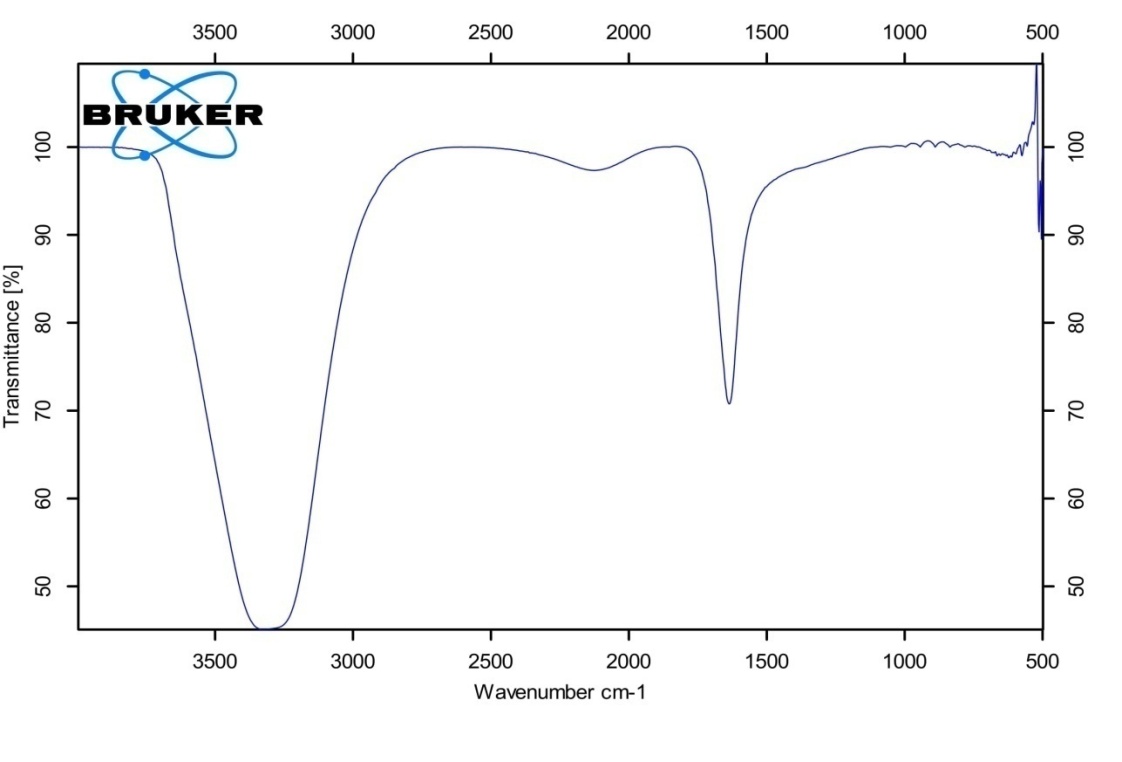


**Figure S5 (a)** FT-IR spectrum of 100 mg/L standard mixed Azo dyes


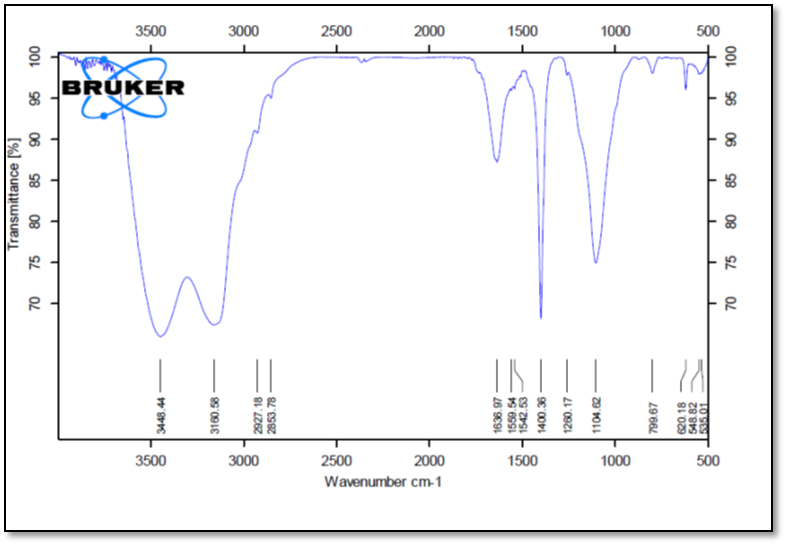


**N-H**

**C-H**

**C-N**

**C=C**

**S=O**

**Figure S5 (b)** FT-IR spectrum of synthetic effluent with 100 mg/L mixed Azo dyes treated in An-SBR

**C=C**

**O-H**

O-H

**Figure S5 (c)** FT-IR spectrum of synthetic effluent with 500 mg/L mixed Azo dyes treated in An-SBR


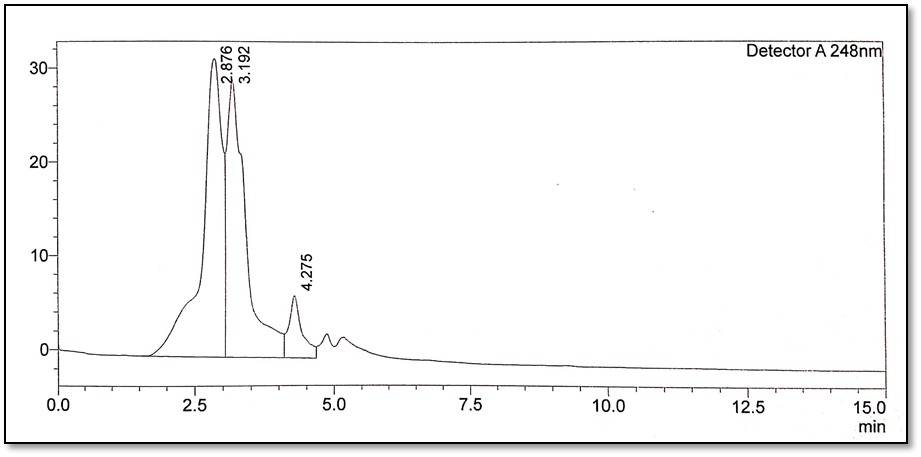


**Figure S6** Elution profile of the untreated synthetic textile effluent

**
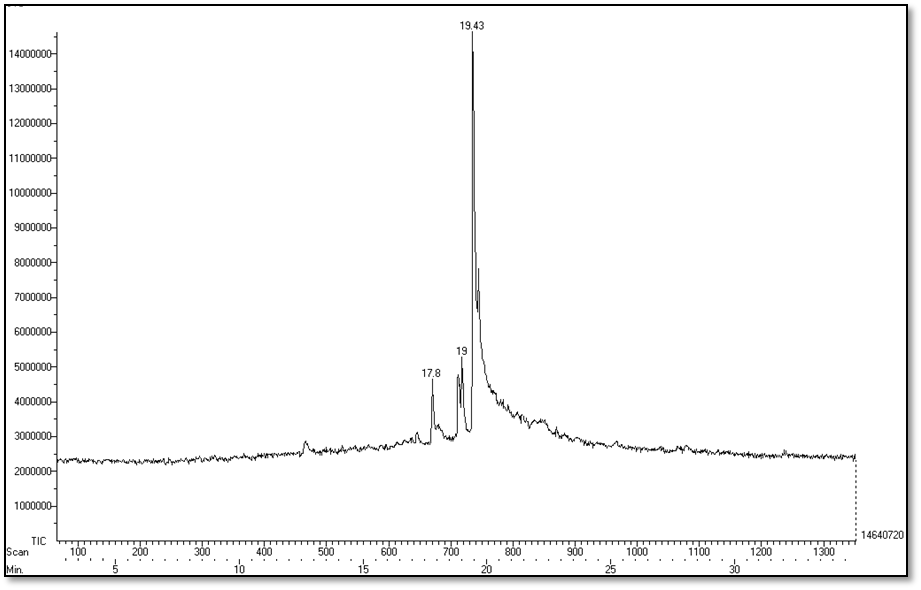
**

**Figure S7** GC-MS chromatogram of the untreated effluent


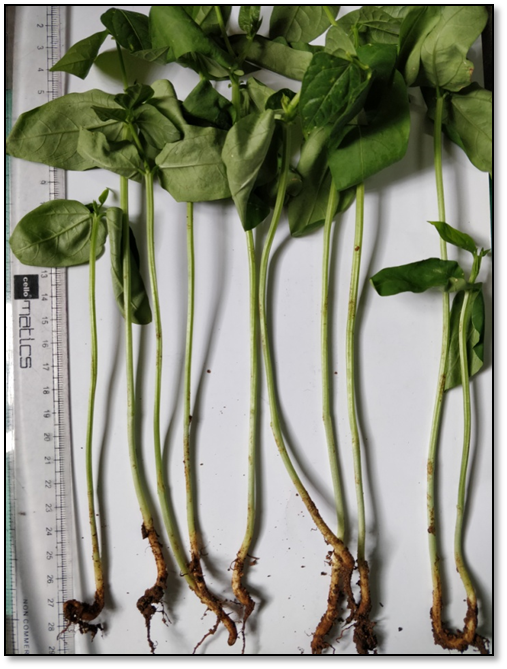


**(a)**


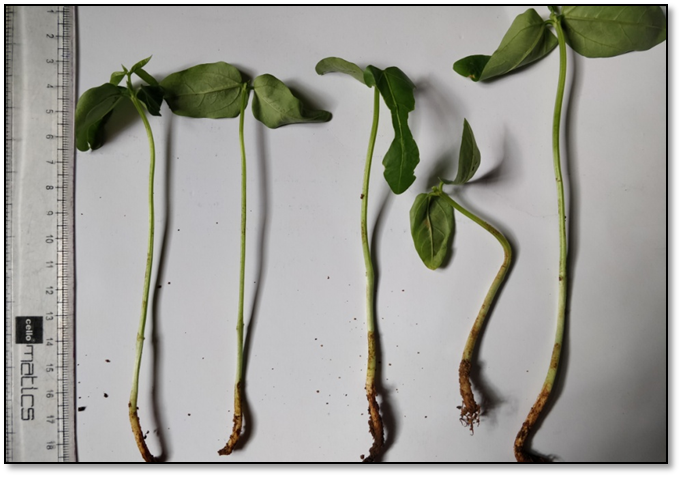


**(b)**

**Figure S8 (a)** Control plants grown in garden soil **(b)** Test plants grown in garden soil mixed with secondary sludge

**Table S1 Root and shoot lengths of the control and test plants**

| **Control plants** | | |
| --- | --- | --- |
| **Plant No.** | **Root length (cm)** | **Shoot length (cm)** |
| 1. | 4.3 | 18.2 |
| 2. | 5.1 | 23.2 |
| 3. | 3.6 | 21.6 |
| 4. | 5.7 | 19.4 |
| 5. | 5.8 | 20.5 |
| 6. | 4.9 | 19.8 |
| 7. | 6.1 | 23.4 |
| 8. | 4.4 | 19.1 |
| 9. | 5.8 | 21.2 |
| 10. | 3.9 | 18.7 |
| **Average** | 4.96 | 20.51 |
| **Test plants** | | |
| 1. | 2.4 | 14.2 |
| 2. | 2.3 | 12.6 |
| 3. | 3.5 | 13.7 |
| 4. | 2.9 | 8.9 |
| 5. | 3.8 | 17.5 |
| **Average** | 2.98 | 13.38 |
